# Supplementary material
Source: PubMed Central journal article supplement (PMC1405880)
Supplement: cmaj_060290_2.pdf [file cmaj_060290_2.pdf]

## Appendix 2: Replacement news story

### **Tony Clement appointed as Canada's new health minister**

**Date:** Feb 22, 2006 **Time:** 11:45 am

Former Ontario health minister Tony Clement, once dubbed "two-tier Tony" for his oft-stated belief there must be "more choice in health care," was appointed federal Minister of Health in the new Conservative government on Feb. 6.

Clement's duties include responsibility for public health, a junior-minister position that was axed in Prime Minister Stephen Harper's streamlined cabinet.

Clement's appointment is "quite shocking," said Mike McBane, executive director of the Canadian Health Coalition an advocacy group for a public health system. "It sends a very clear signal, that the Prime Minister would appoint someone who is ideologically committed to privatizing the delivery of the public health care system, someone who was aggressively involved in dismantling the Ontario health care system, in firing nurses and shutting down hospitals."

During his tenure as Ontario's health minister from February 2001 to October 2003, Clement supported privatization and deregulation of long-term care facilities and the creation of for-profit hospitals in Brantford and Ottawa.

Clement also oversaw Ontario's handling of the 2003 SARS crisis, during which he was lauded for his able administration and candid admission that the public health system was "close to collapse."

The new minister's top priority will be to implement the Conservative election promise to develop a Patient Wait Times Guarantee, Clement told reporters.

CMA President Ruth Collins-Nakai says unlike previous federal ministers of health Clement already has an extensive knowledge of Canada's health care issues.

"This is a significant plus," she told CMAJ. "We don't have to spend as much time briefing him... we can discuss the issues." Topping the agenda are wait times and health human resources, she added.

Harper's decision to abolish the Ministry of State (Public Health) position, established in December 2003 to oversee the creation of a Public Health Agency of Canada and other public health programming, "goes against what I think a lot of the provinces have learned," says Dr. Carolyn Bennett, the out-going minister.

Having a separate minister with the time to bring a public profile to health prevention and profile is critical in combating the "other epidemics" of diabetes, cancer and heart disease, and working with the provinces to improve determinants of health, she said.

But Collins-Nakai says "the fact that the Public Health Agency remains in place gives us comfort in Canada's ability to have a strong public health system." Having the agency reporting directly to the minister of health is also more "workable ... at least in raising issues," she added. — Wayne Kondro, Ottawa; Barbara Sibbald, *CMAJ*
